# Supplementary material for: A plasma protein classifier for predicting amyloid burden for preclinical Alzheimer’s disease
Source: PubMed Central journal article supplement — Sci Adv. 2019 Feb 6;5(2):eaau7220. doi: 10.1126/sciadv.aau7220 (PMC6365111; doi:10.1126/sciadv.aau7220), 2019-02-06
Supplement: aau7220_SM.pdf [file aau7220_SM.pdf]

## Supplementary Materials for

### **A plasma protein classifier for predicting amyloid burden for preclinical Alzheimer's disease**

Nicholas J. Ashton, Alejo J. Nevado-Holgado, Imelda S. Barber, Steven Lynham, Veer Gupta, Pratishtha Chatterjee, Kathryn Goozee, Eugene Hone, Steve Pedrini, Kaj Blennow, Michael Schöll, Henrik Zetterberg, Kathryn A. Ellis, Ashley I. Bush, Christopher C. Rowe, Victor L. Villemagne, David Ames, Colin L. Masters, Dag Aarsland, John Powell, Simon Lovestone, Ralph Martins, Abdul Hye\*

\*Corresponding author. Email: [abdul.1.hye@kcl.ac.uk](mailto:abdul.1.hye@kcl.ac.uk)

Published 6 February 2019, *Sci. Adv.* **5**, eaau7220 (2019)  
DOI: 10.1126/sciadv.aau7220

#### **Other Supplementary Material for this manuscript includes the following:**

(available at [advances.sciencemag.org/cgi/content/full/5/2/eaau7220/DC1](https://advances.sciencemag.org/cgi/content/full/5/2/eaau7220/DC1))

Table S1 (Microsoft Excel format). Residual scores for all 560 protein groups.

Table S2 (Microsoft Excel format). The association of plasma protein groups with A $\beta$  SUVR in cognitively unimpaired subjects.

Table S3 (Microsoft Excel format). The association of plasma protein groups with A $\beta$  SUVR in all subjects.
